# Supplementary material
Source: HighWire-hosted journal article supplement (https://erj.ersjournals.com/content/56/5/2003116)
Supplement: inline-supplementary-material-1 [file inline-supplementary-material-1.pdf]

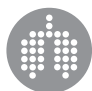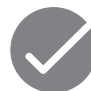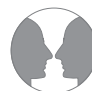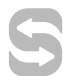

SHAREABLE PDF

# Factors limiting the utility of bronchoalveolar lavage in the diagnosis of COVID-19

Deepak Aggarwal and Varinder Saini

**Affiliation:** Dept of Pulmonary Medicine, Government Medical College and Hospital, Chandigarh, India.

**Correspondence:** Deepak Aggarwal, Dept of Pulmonary Medicine, Block-D, Level-5, Government Medical College and Hospital, Sector-32, Chandigarh, Pin-160030, India. E-mail: drdeepak@hotmail.com

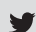

@ERSpublications

**Bronchoalveolar lavage has a specific place in the diagnosis of COVID-19. The clinical performance of BAL rRt-PCR is dynamic in nature and depends on different clinical and demographic factors.** <https://bit.ly/3aZUAPB>

**Cite this article as:** Aggarwal D, Saini V. Factors limiting the utility of bronchoalveolar lavage in the diagnosis of COVID-19. *Eur Respir J* 2020; 56: 2003116 [<https://doi.org/10.1183/13993003.03116-2020>].

This single-page version can be shared freely online.

## To the Editor:

We read with interest study by GERI *et al.* [1], in which the authors have demonstrated a strong agreement between negative nasopharyngeal (NPs)/nasal (Ns) swab and bronchoalveolar lavage (BAL) real-time reverse transcriptase-polymerase chain reaction (rRT-PCR) in the diagnosis of coronavirus disease 2019 (COVID-19) among hospitalised patients. The study findings contradicted earlier reports [2] and suggested a limited utility of BAL. However, the results need to be interpreted comprehensively before drawing any conclusion.
